# Supplementary material for: Mass Spectrometric Proof of Predicted Peptides: Novel Adipokinetic Hormones in Insects
Source: MDPI journal article supplement (doi:10.3390/molecules27196469), 2022-10-01
Supplement: s1 [file s1]

Article

# Mass Spectrometric Proof of Predicted Peptides: Novel Adipokinetic Hormones in Insects

Heather G. Marco <sup>1,†</sup>, Simone König <sup>2,†</sup> and Gerd Gäde <sup>1,\*</sup>

<sup>1</sup> Department of Biological Sciences, University of Cape Town, Private Bag, Rondebosch, Cape Town ZA-7700, South Africa; heather.marco@uct.ac.za

<sup>2</sup> IZKF Core Unit Proteomics, Interdisciplinary Center for Clinical Research, University of Münster, Röntgenstr. 21, 48149 Münster, Germany; koenigs@uni-muenster.de

\* Correspondence: gerd.gade@uct.ac.za; Tel.: +27-21-650-3615

† These authors contributed equally to this paper.

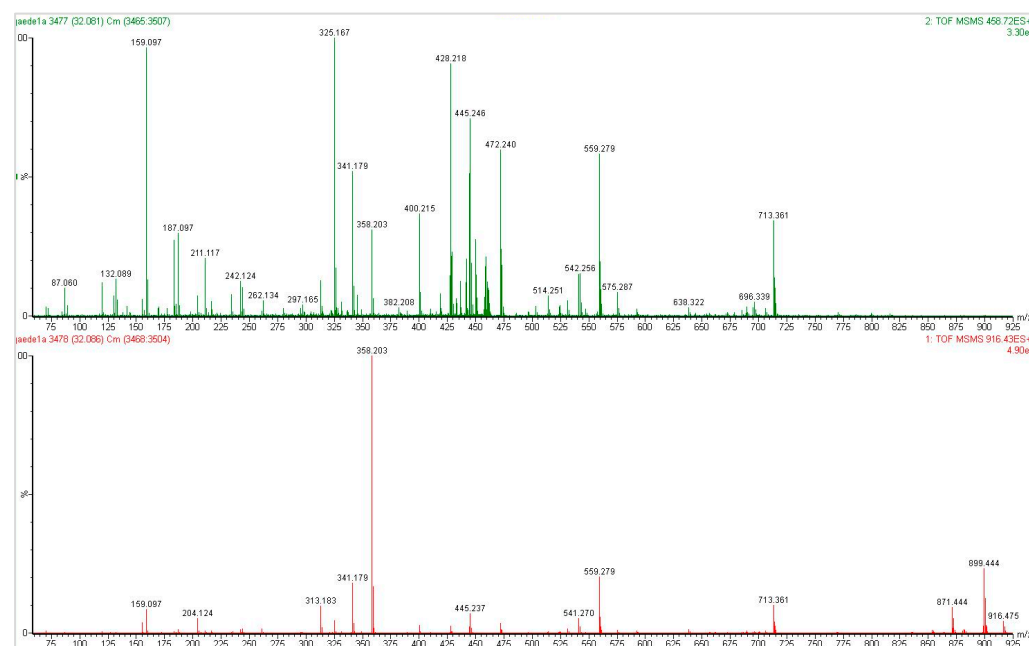

|           |         |         |         |         |         |         |         |
|-----------|---------|---------|---------|---------|---------|---------|---------|
| <b>b</b>  | 211.108 | 325.151 | 472.220 | 559.252 | 656.304 | 713.326 | –       |
| <b>i</b>  | 72.081  | 87.056  | 120.081 | 60.045  | 70.066  | 30.034  | 159.092 |
| <b>b~</b> | 193.098 | 307.141 | 454.209 | 541.241 | 638.294 | 695.315 | –       |
| <b>b*</b> | 194.082 | 308.125 | 455.193 | 542.225 | 639.278 | 696.299 | –       |
|           | 1       | 2       | 3       | 4       | 5       | 6       | 7       |
|           | Val     | Asn     | Phe     | Ser     | Pro     | Gly     | Trp     |
|           | 7       | 6       | 5       | 4       | 3       | 2       | 1       |
| <b>y"</b> | –       | 706.331 | 592.288 | 445.220 | 358.188 | 261.135 | 204.114 |
| <b>y~</b> | –       | 688.321 | 574.278 | 427.209 | 340.177 | 243.125 | 186.103 |
| <b>y*</b> | –       | 689.305 | 575.262 | 428.193 | 341.161 | 244.109 | 187.087 |

**Figure S1.** MS/MS spectra of the singly- and the doubly-charged ions of a peptide assigned to Manto-CC in *K. flavicollis* and the calculation of the expected fragment ions for sequence pQVNF-SPGWa using MassLynx (blocked termini: pQ and amidation).

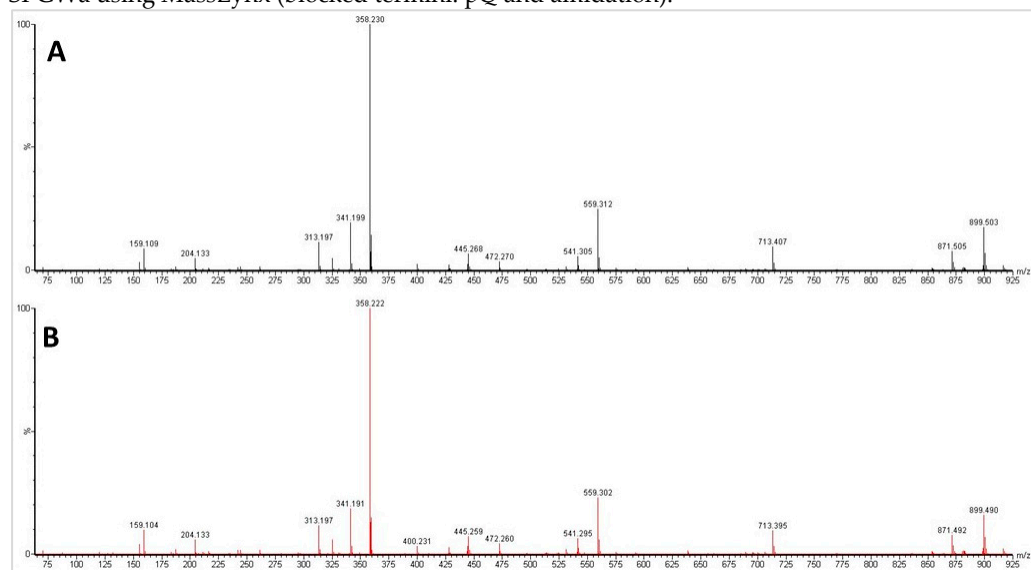

**Figure S2.** MS/MS spectra of the doubly-charged ions of the peptide assigned to Manto-CC in *K. flavicollis*. A) Standard peptide and B) CC extract were run with the same MS/MS method.

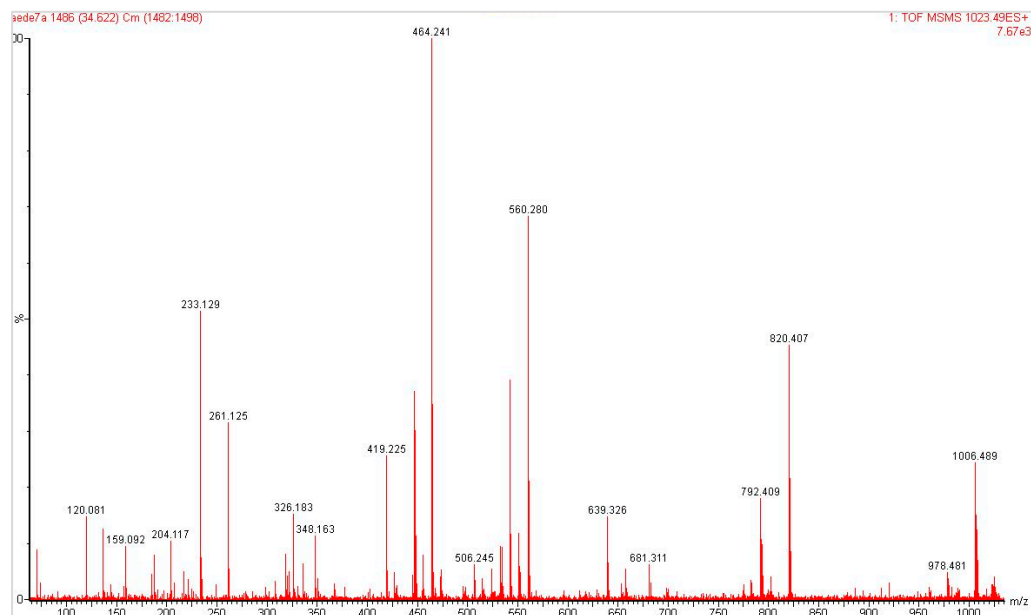

|           |         |         |         |         |         |         |         |
|-----------|---------|---------|---------|---------|---------|---------|---------|
| <b>b</b>  | 225.124 | 326.172 | 473.240 | 560.272 | 657.325 | 820.388 | -       |
| <b>i</b>  | 86.097  | 74.061  | 120.081 | 60.045  | 70.066  | 136.076 | 159.092 |
| <b>b~</b> | 207.113 | 308.161 | 455.229 | 542.262 | 639.314 | 802.378 | -       |
| <b>b*</b> | 208.097 | 309.145 | 456.214 | 543.246 | 640.298 | 803.362 | -       |
|           | 1       | 2       | 3       | 4       | 5       | 6       | 7       |
|           | Leu     | Thr     | Phe     | Ser     | Pro     | Tyr     | Trp     |
|           | 7       | 6       | 5       | 4       | 3       | 2       | 1       |
| <b>y*</b> | -       | 799.378 | 698.330 | 551.262 | 464.230 | 367.177 | 204.114 |
| <b>y~</b> | -       | 781.367 | 680.320 | 533.251 | 446.219 | 349.166 | 186.103 |
| <b>y*</b> | -       | 782.351 | 681.304 | 534.235 | 447.203 | 350.150 | 187.087 |

**Figure S3.** MS/MS spectrum of the singly-charged ion of the peptide assigned to Volpe-CC in *P. tapulus* and the calculation of the expected fragment ions for sequence pQLTFSPYWa using Mass-Lynx (blocked termini: pQ and amidation).

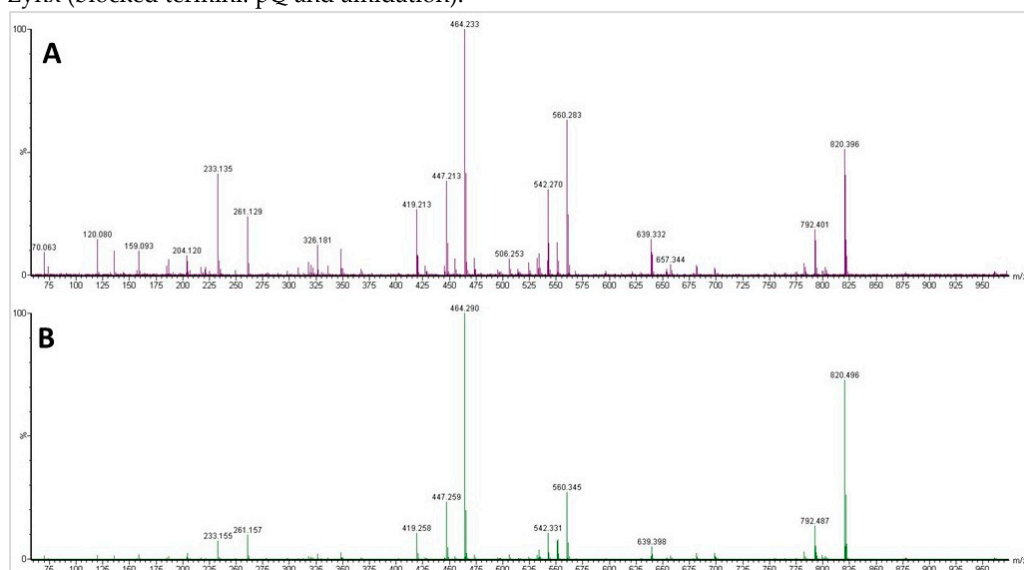

**Figure S4.** MS/MS spectra of the singly-charged ion of the peptide assigned to Volpe-CC in *P. tapulus*. A) CC extract and B) standard peptide were run with slightly different collision energy (17–26 eV and 17–25 eV), but the fragments are identical.

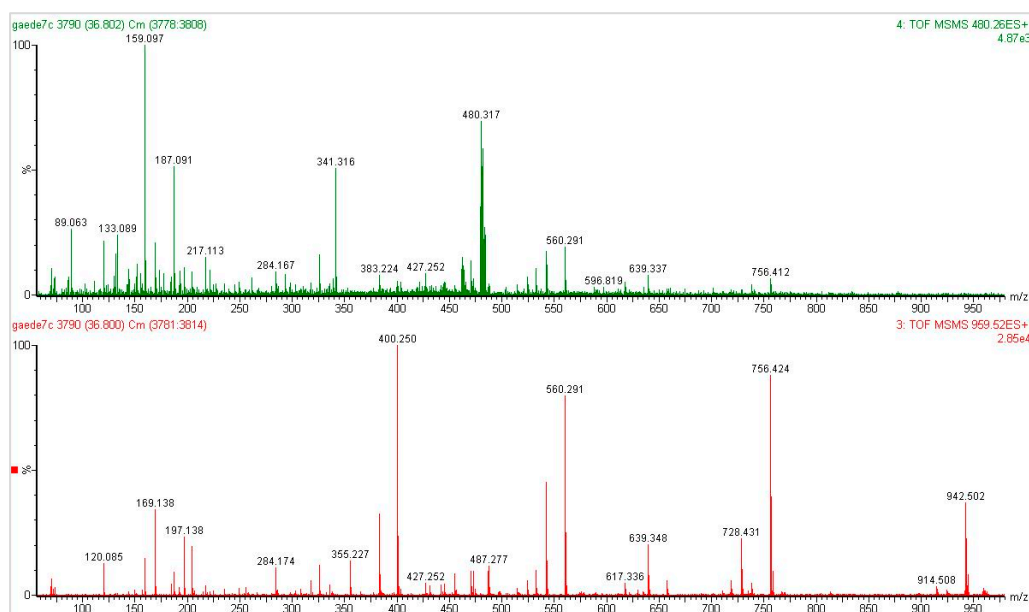

|           |         |         |         |         |         |         |         |
|-----------|---------|---------|---------|---------|---------|---------|---------|
| <b>b</b>  | 225.124 | 326.172 | 473.240 | 560.272 | 657.325 | 756.393 | –       |
| <b>i</b>  | 86.097  | 74.061  | 120.081 | 60.045  | 70.066  | 72.081  | 159.092 |
| <b>b~</b> | 207.113 | 308.161 | 455.229 | 542.262 | 639.314 | 738.383 | –       |
| <b>b*</b> | 208.097 | 309.145 | 456.214 | 543.246 | 640.298 | 739.367 | –       |
|           | 1       | 2       | 3       | 4       | 5       | 6       | 7       |
|           | Leu     | Thr     | Phe     | Ser     | Pro     | Val     | Trp     |
|           | 7       | 6       | 5       | 4       | 3       | 2       | 1       |
| <b>y"</b> | –       | 735.383 | 634.335 | 487.267 | 400.235 | 303.182 | 204.114 |
| <b>y~</b> | –       | 717.372 | 616.325 | 469.256 | 382.224 | 285.172 | 186.103 |
| <b>y*</b> | –       | 718.356 | 617.309 | 470.240 | 383.208 | 286.156 | 187.087 |

**Figure S5.** MS/MS spectra of the singly- and doubly-charged ions of the peptide detected at  $m/z$  959.52 tentatively assigned to sequence pQLTFSPVW in *P. tapulus* and the calculation of the expected fragment ions using MassLynx (blocked termini: pQ and amidation).

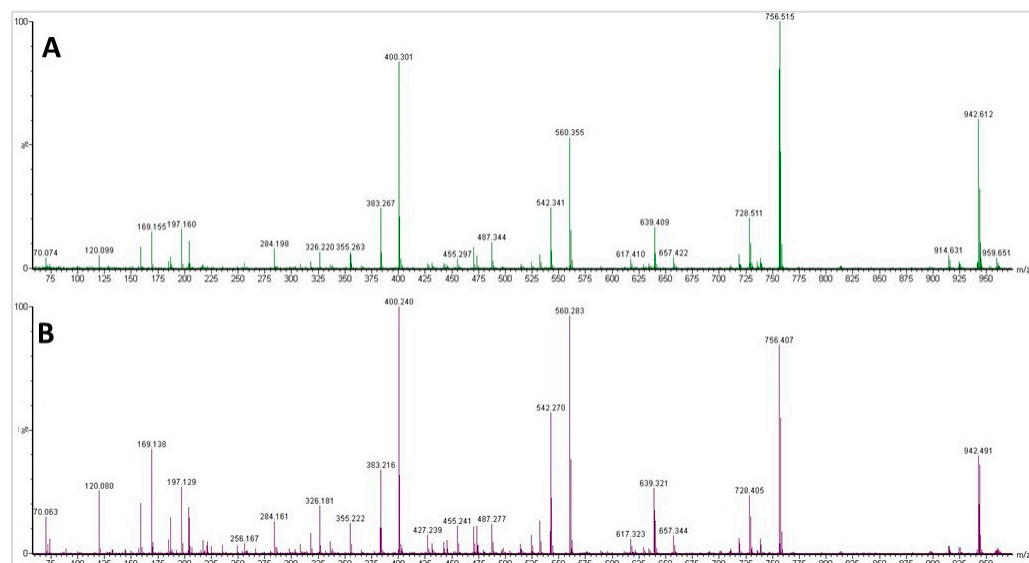

**Figure S6.** MS/MS spectra of the singly-charged ions of the peptide detected at  $m/z$  959.52 as assigned to sequence pQLTFSPVW in *P. tapulus*, code-named Pegta-AKH. A) Standard peptide and B) CC extract were analyzed with the same MS/MS method and instrumentation.

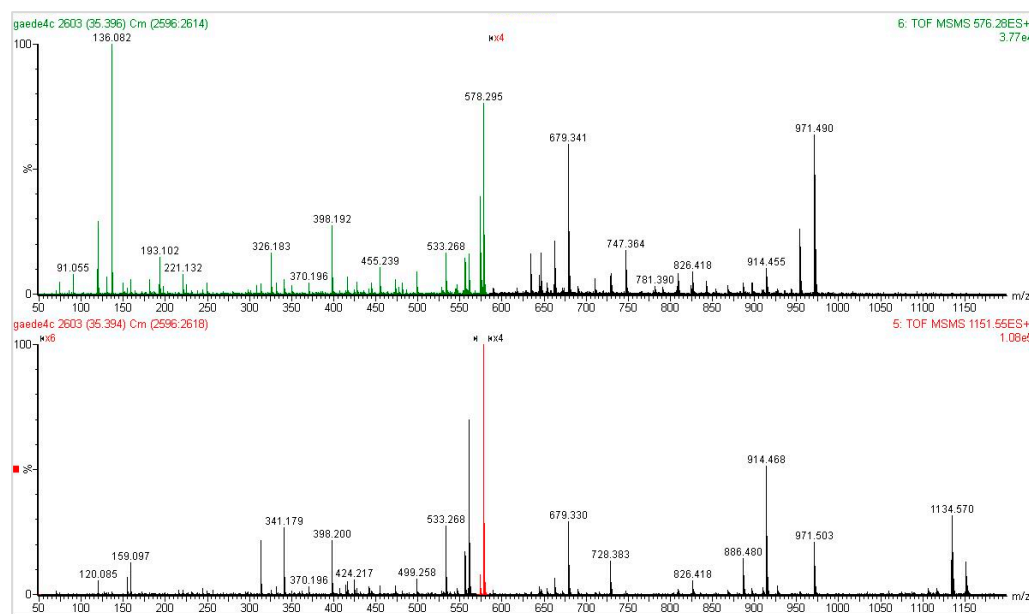

|           |         |         |         |         |         |         |         |         |         |
|-----------|---------|---------|---------|---------|---------|---------|---------|---------|---------|
| <b>b</b>  | 225.124 | 326.172 | 473.240 | 574.288 | 671.341 | 728.362 | 914.441 | 971.463 | -       |
| <b>i</b>  | 86.097  | 74.061  | 120.081 | 74.061  | 70.066  | 30.034  | 159.092 | 30.034  | 136.076 |
| <b>b~</b> | 207.113 | 308.161 | 455.229 | 556.277 | 653.330 | 710.351 | 896.431 | 953.452 | -       |
| <b>b*</b> | 208.097 | 309.145 | 456.214 | 557.261 | 654.314 | 711.335 | 897.415 | 954.436 | -       |
|           | 1       | 2       | 3       | 4       | 5       | 6       | 7       | 8       | 9       |
|           | Leu     | Thr     | Phe     | Thr     | Pro     | Gly     | Trp     | Gly     | Tyr     |
|           | 9       | 8       | 7       | 6       | 5       | 4       | 3       | 2       | 1       |
| <b>y*</b> | -       | 927.436 | 826.389 | 679.320 | 578.273 | 481.220 | 424.198 | 238.119 | 181.098 |
| <b>y~</b> | -       | 909.426 | 808.378 | 661.310 | 560.262 | 463.209 | 406.188 | 220.109 | 163.087 |
| <b>y*</b> | -       | 910.410 | 809.362 | 662.294 | 561.246 | 464.193 | 407.172 | 221.093 | 164.071 |

**Figure S7.** MS/MS spectra of the singly- and doubly-charged ions of the peptide detected at  $m/z$  1151.55 assigned to sequence pQLTFTPGWGYa for Tabat-HoTH in *H. pluvialis* and the calculation of the expected fragment ions using MassLynx (blocked termini: pQ and amidation).

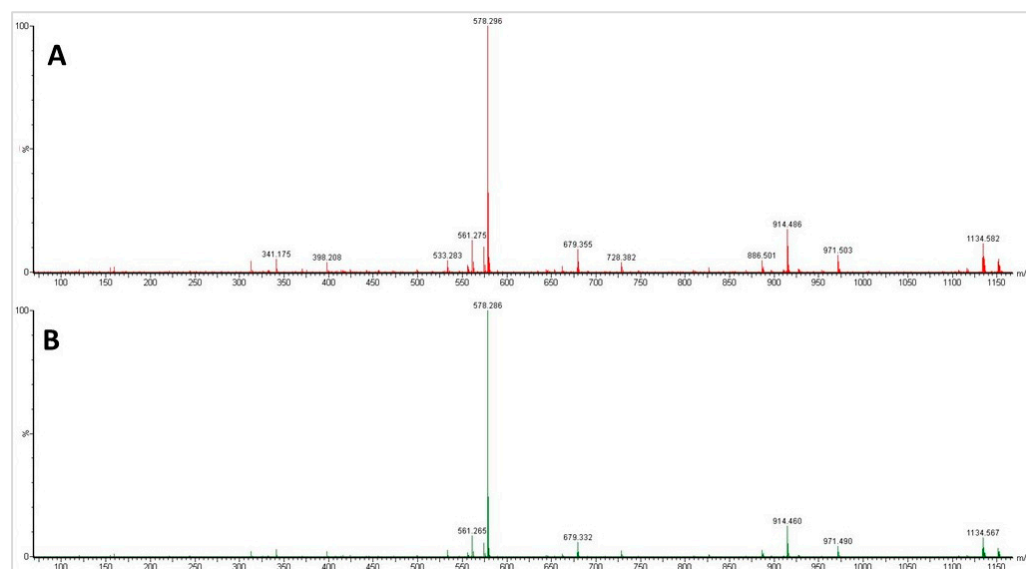

**Figure S8.** MS/MS spectra of the singly-charged ions of the peptide detected at  $m/z$  1151.55 assigned to sequence pQLTFTPGWGYa for Tabat-HoTH in *H. pluvialis*. A) CC extract and B) stand-ard peptide were run with the same collision energy ramp.

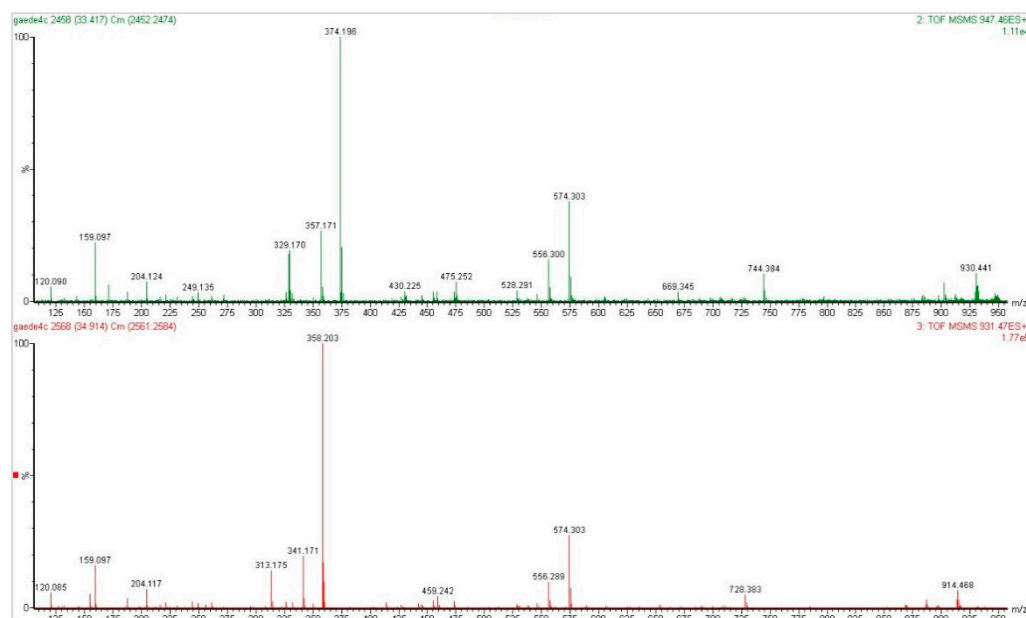

|           |         |         |         |         |         |         |         |
|-----------|---------|---------|---------|---------|---------|---------|---------|
| <b>b</b>  | 225.124 | 326.172 | 473.240 | 574.288 | 687.335 | 744.357 | -       |
| <b>i</b>  | 86.097  | 74.061  | 120.081 | 74.061  | 86.061  | 30.034  | 159.092 |
| <b>b~</b> | 207.113 | 308.161 | 455.229 | 556.277 | 669.325 | 726.346 | -       |
| <b>b*</b> | 208.097 | 309.145 | 456.214 | 557.261 | 670.309 | 727.330 | -       |
|           | 1       | 2       | 3       | 4       | 5       | 6       | 7       |
|           | Leu     | Thr     | Phe     | Thr     | Hyp     | Gly     | Trp     |
|           | 7       | 6       | 5       | 4       | 3       | 2       | 1       |
| <b>y"</b> | -       | 723.347 | 622.299 | 475.230 | 374.183 | 261.135 | 204.114 |
| <b>y~</b> | -       | 705.336 | 604.288 | 457.220 | 356.172 | 243.125 | 186.103 |
| <b>y*</b> | -       | 706.320 | 605.272 | 458.204 | 357.156 | 244.109 | 187.087 |

  

|           |         |         |         |         |         |         |         |
|-----------|---------|---------|---------|---------|---------|---------|---------|
| <b>b</b>  | 225.124 | 326.172 | 473.240 | 574.288 | 671.341 | 728.362 | -       |
| <b>i</b>  | 86.097  | 74.061  | 120.081 | 74.061  | 70.066  | 30.034  | 159.092 |
| <b>b~</b> | 207.113 | 308.161 | 455.229 | 556.277 | 653.330 | 710.351 | -       |
| <b>b*</b> | 208.097 | 309.145 | 456.214 | 557.261 | 654.314 | 711.335 | -       |
|           | 1       | 2       | 3       | 4       | 5       | 6       | 7       |
|           | Leu     | Thr     | Phe     | Thr     | Pro     | Gly     | Trp     |
|           | 7       | 6       | 5       | 4       | 3       | 2       | 1       |
| <b>y"</b> | -       | 707.352 | 606.304 | 459.236 | 358.188 | 261.135 | 204.114 |
| <b>y~</b> | -       | 689.341 | 588.293 | 441.225 | 340.177 | 243.125 | 186.103 |
| <b>y*</b> | -       | 690.325 | 589.277 | 442.209 | 341.161 | 244.109 | 187.087 |

**Figure S9.** MS/MS spectra of the doubly-charged ions of the related peptides detected in *H. pluvialis* at  $m/z$  931.47 and 947.46 assigned, respectively, to Tabat-AKH (pQLTFTPGWa) and its hydroxyproline derivative. The expected fragment ions for each of these peptide sequences were calculated using MassLynx (blocked termini: pQ and amidation).

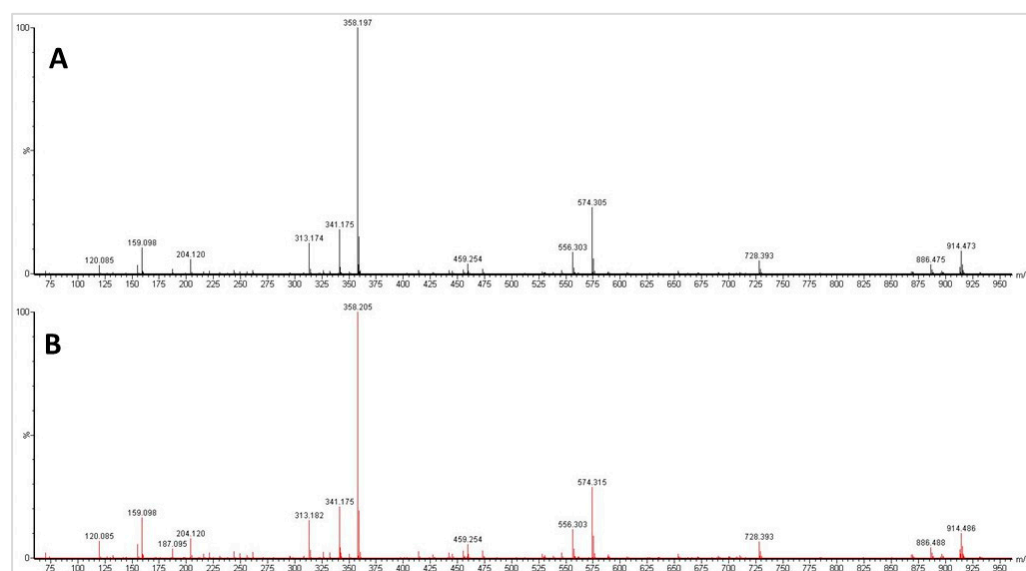

**Figure S10.** MS/MS spectra of the singly-charged ions of the peptide detected at  $m/z$  931.47 assigned to sequence pQLTFTPGWa for Tabat-AKH in *H. pluvialis*. A) Standard peptide and B) CC extract were analyzed with the same MS/MS method.



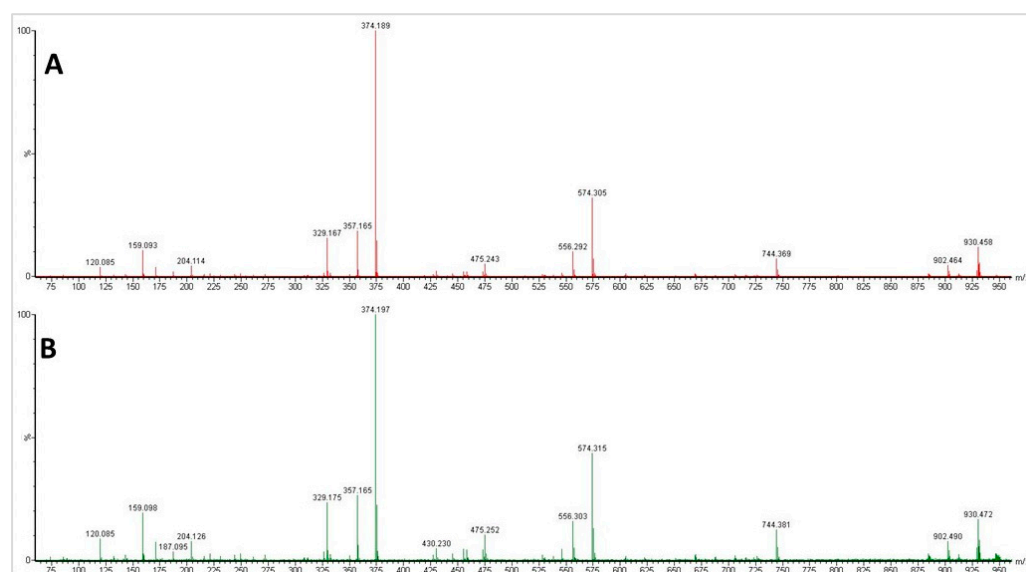

**Figure S11.** MS/MS spectra of the singly-charged ions of the peptide detected at 947.46 assigned to the hydroxyproline derivative of Tabat-AKH (HaepI-AKH) in *H. pluvialis*. A) Standard peptide (33.3 min) and B) CC extract (33.3 min) were analyzed with the same MS/MS method.

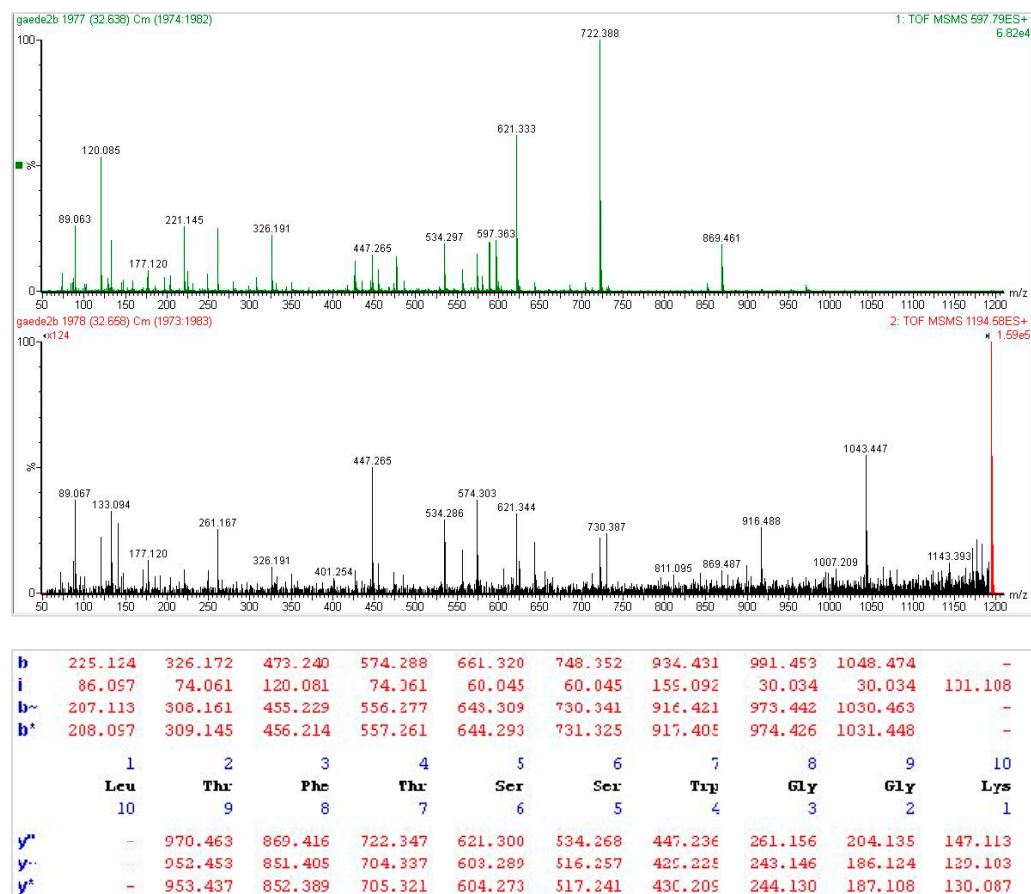

**Figure S12.** MS/MS spectra of the singly- and the doubly-charged ions of the peptide detected at  $m/z$  1194.58 assigned to sequence pQLTFTSSWGK for Vanca-AKH in *O. nubilalis* and the calculation of the expected fragment ions using MassLynx (blocked terminus: pQ).

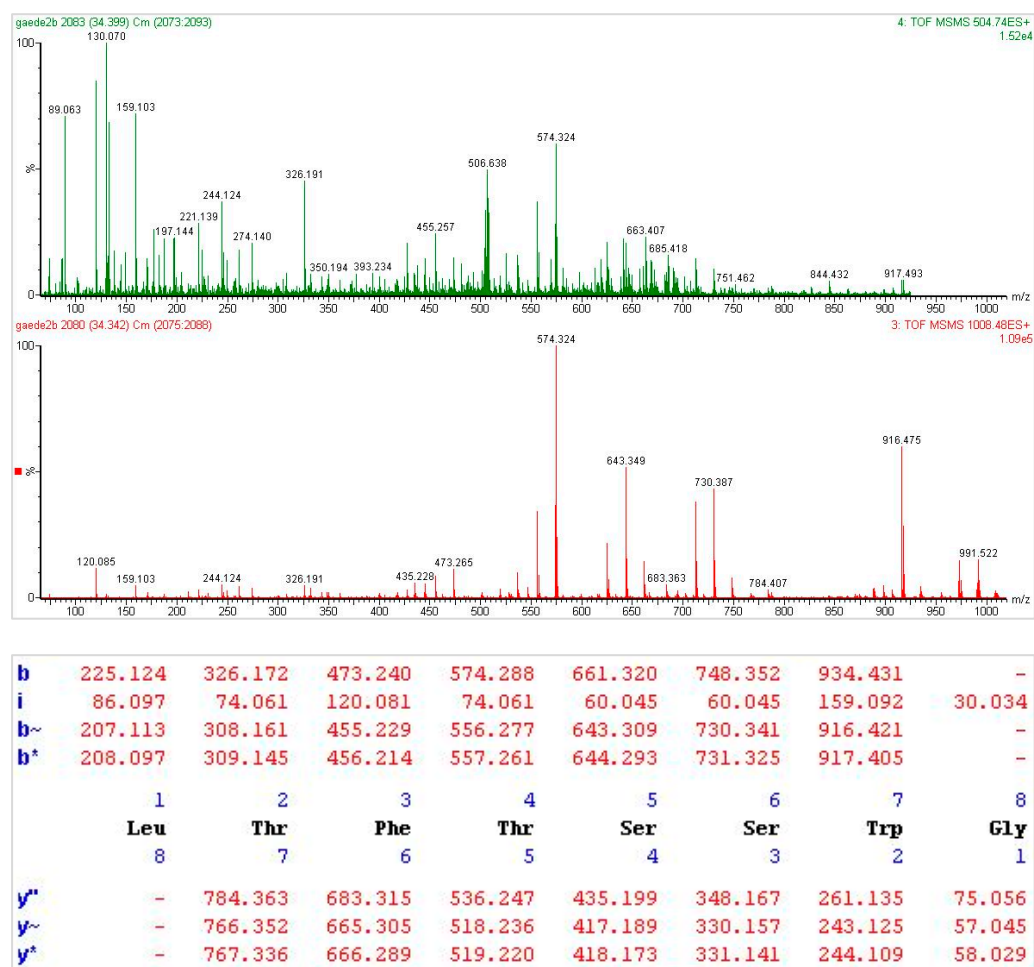

**Figure S13.** MS/MS spectra of the singly- and the doubly-charged ions of the peptide detected at  $m/z$  1008.48 assigned to sequence pQLTFTSSWGa for Manse-AKH in *O. nubilalis* and the calculation of the expected fragment ions using MassLynx (blocked termini: pQ and amidation).

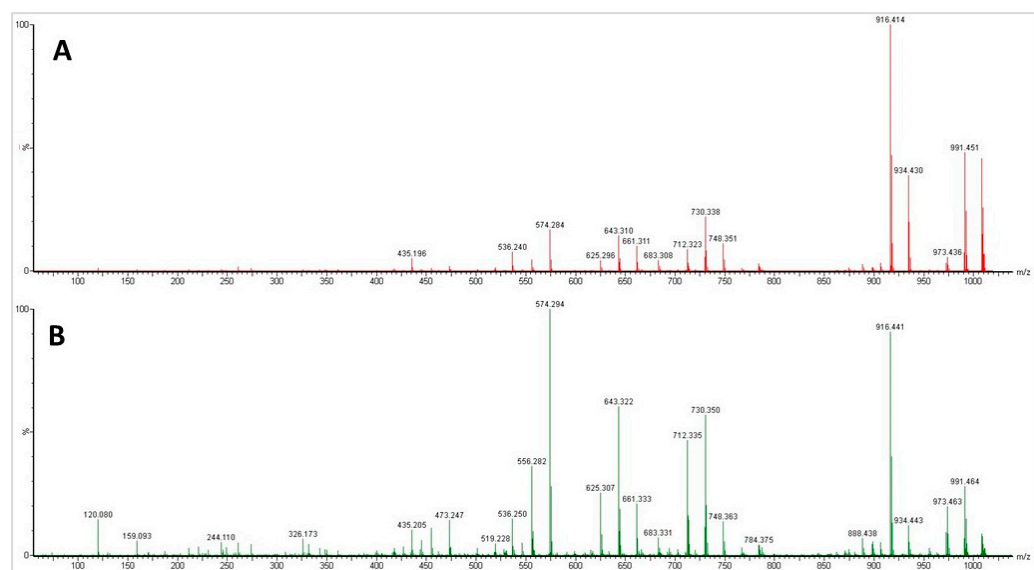

**Figure S14.** MS/MS spectra of the singly-charged ions of the peptide detected at  $m/z$  1008.48 assigned to sequence pQLTFTSSWGa for Manse-AKH in *O. nubilalis*. A) Standard peptide (34.7 min) and B) CC extract (34.8 min) were with slightly different collision energy (15–20 eV and 17–26 eV), but the fragments are identical.



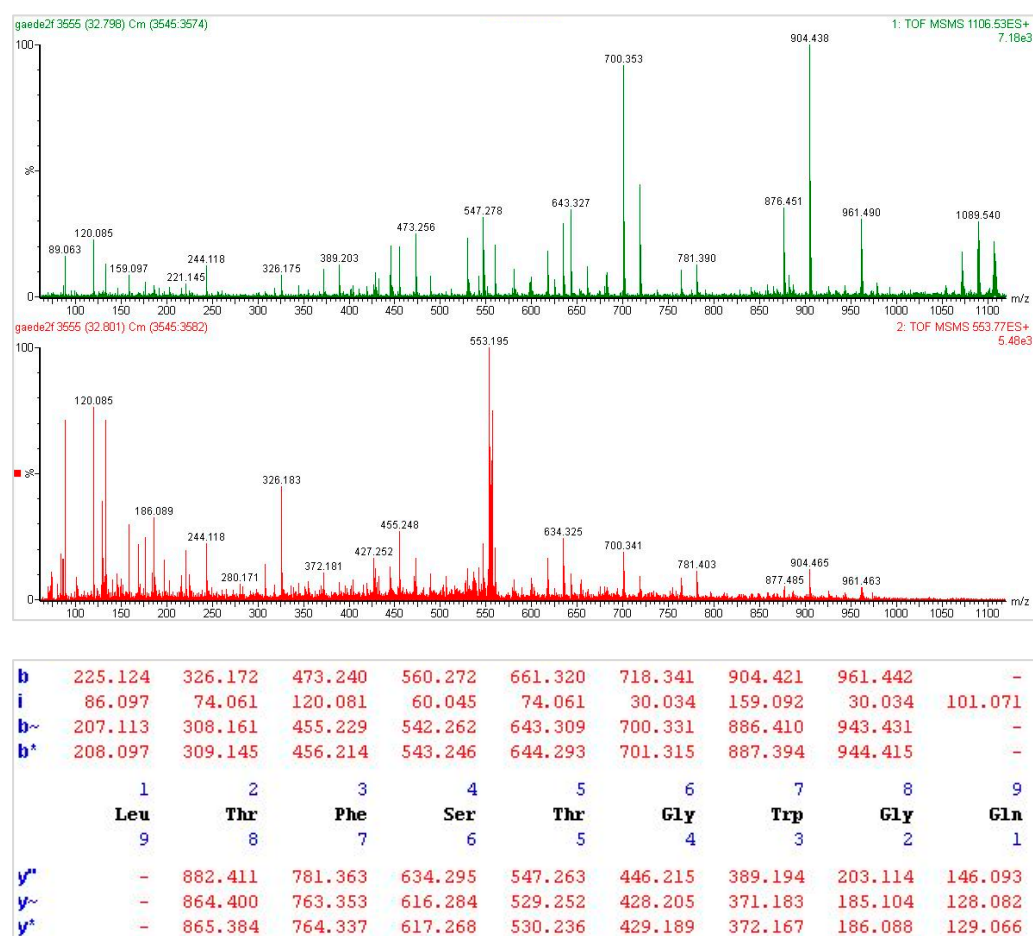

**Figure S15.** MS/MS spectra of the singly- and the doubly-charged ions of the peptide detected at  $m/z$  1106.53 assigned to sequence pQLTFSTGWGQa for Ostnu-AKH in *O. nubilalis* and the calculation of the expected fragment ions using MassLynx (blocked termini: pQ and amidation).

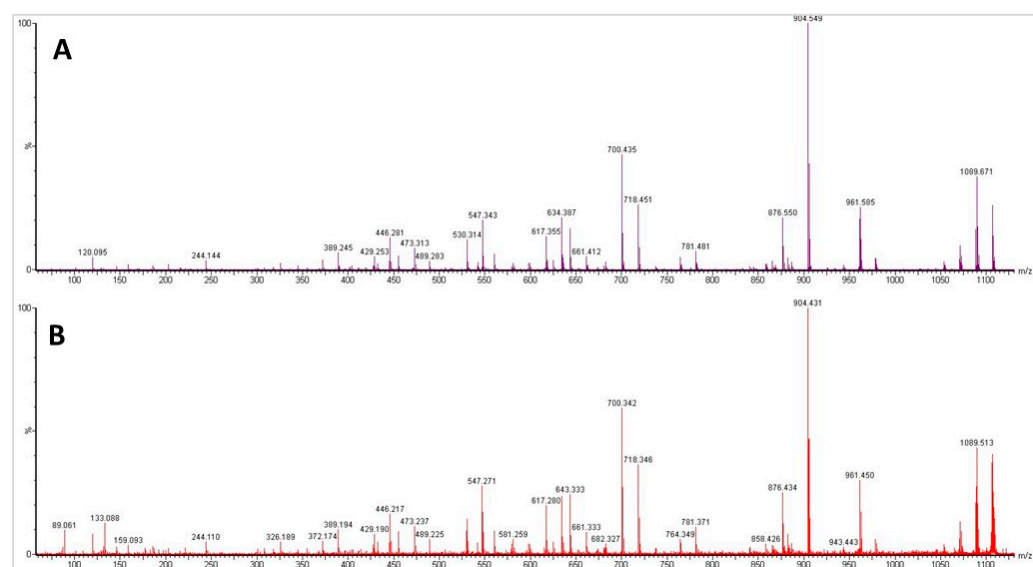

**Figure S16.** MS/MS spectra of the singly- and the doubly-charged ions of the peptide detected at  $m/z$  1106.53 assigned to sequence pQLTFSTGWGQa for Ostnu-AKH in *O. nubilalis*. A) Standard peptide (34.2 min) and B) CC extract (34.3) were run with the same MS/MS method.

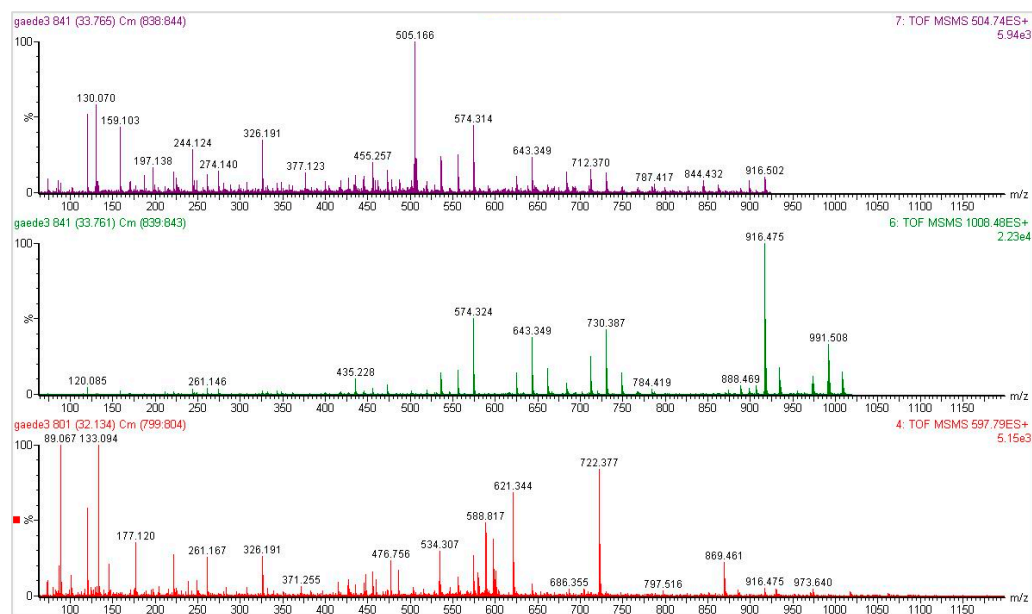

**Figure S17.** MS/MS spectra of the singly- and the doubly-charged ions of the peptides detected for Manse- and Vanca-AKH in *C. culmella*.

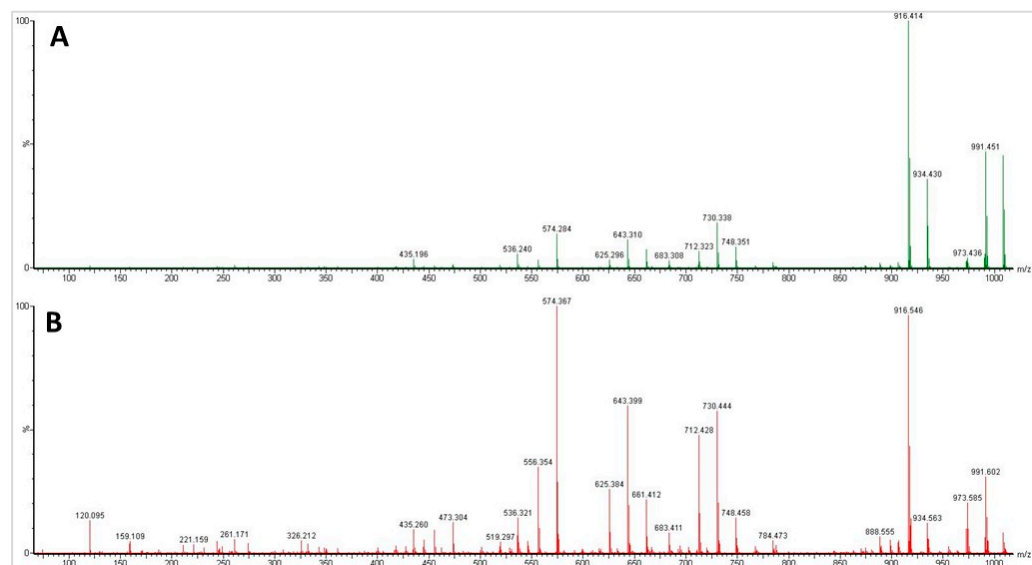

**Figure S18.** MS/MS spectra of the singly- and the doubly-charged ions of the peptides detected for Manse-AKH in *C. culmella*. A) Standard peptide and B) CC extract were run with slightly different collision energy (15–20 eV and 17–26 eV), but the fragments are identical.

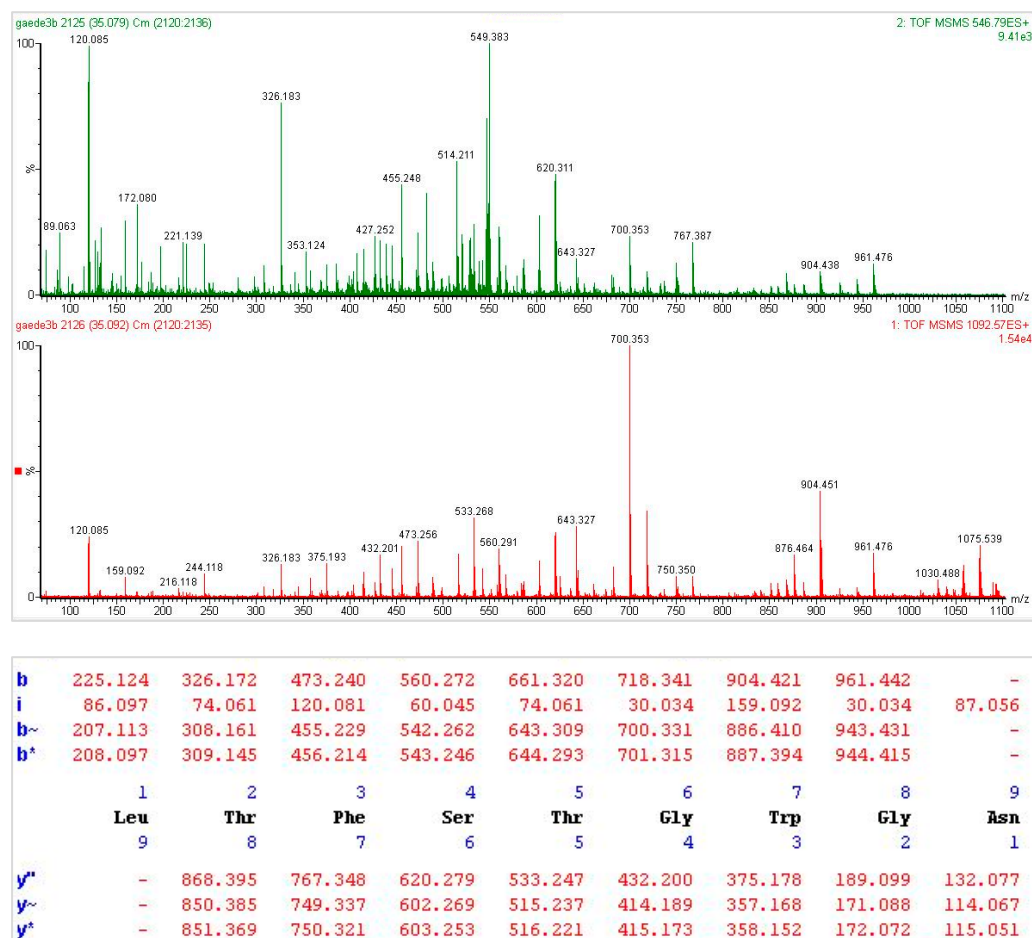

**Figure S19.** MS/MS spectra of the singly- and the doubly-charged ions of the peptide detected at  $m/z$  1092.57 assigned to sequence pQLTFSTGWGN for Chipa-AKH in *C. culmella* and the calculation of the expected fragment ions using MassLynx (blocked termini: pQ and amidation).

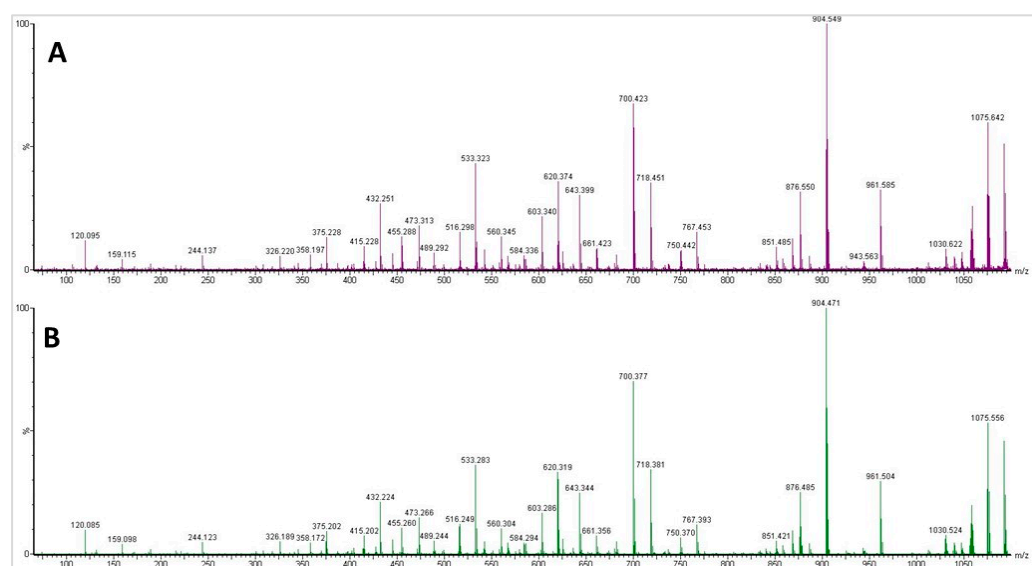

**Figure S20.** MS/MS spectra of the singly-charged ions of the peptide detected at  $m/z$  1092.57 assigned to sequence pQLTFSTGWGN for Chipa-AKH in *C. culmella*. A) CC extract and B) standard peptide were analyzed with the same MS/MS method.

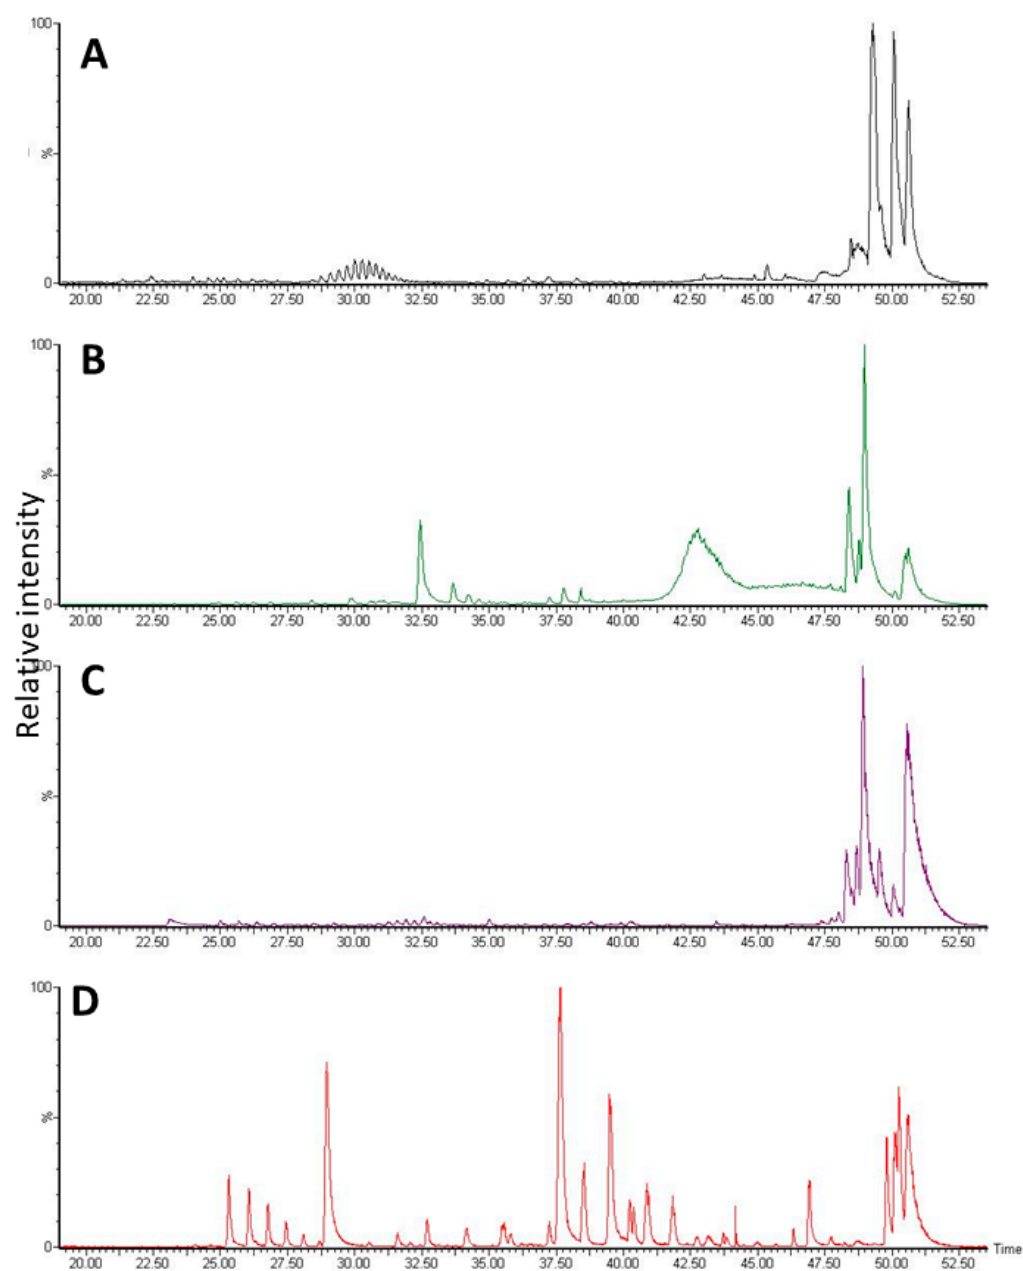

**Figure S21.** LC-chromatograms for the base peak in the overview scans for the CC extract of A) *P. tapulus*, B) *C. culmella* C) *O. nubilalis*, D) *K. flavicollis*.
